# Supplementary material
Source: MDPI journal article supplement (https://www.mdpi.com/2073-445X/12/3/559)
Supplement: s1 [file s1 › land-2244687-supplementary.pdf]

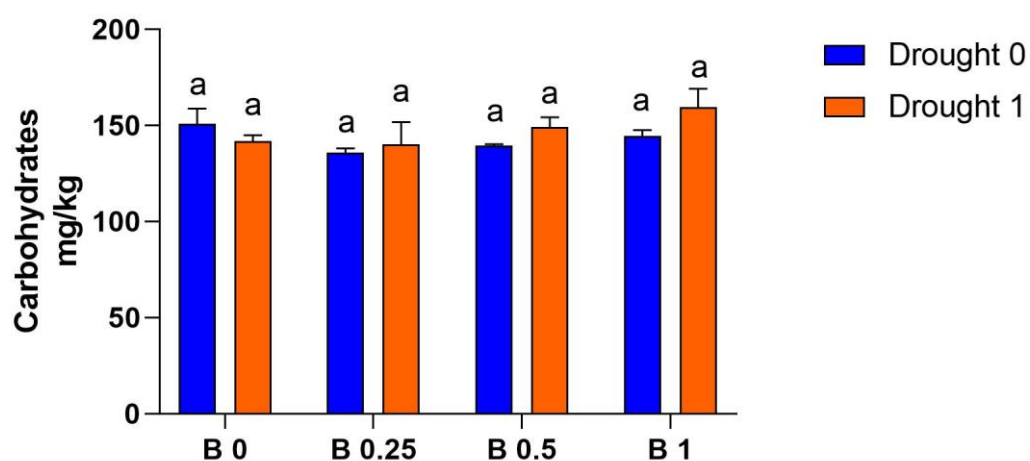

**Figure S1.** Concentration of soil carbohydrate (extracted with sulfuric acid) affected by the application of mineral biochar under drought stress. Data are shown as mean  $\pm$  S.E.M, and different letters denote statistically significant differences between experimental groups at the  $p < 0.05$  level according to two-way ANOVA with Šidák multiple comparison test.
